# Supplementary material
Source: publisher site journal article supplement (https://www.dovepress.com/article/419740)
Supplement: Supplementary file 1 [file get_supplementary_file.php]

***Toxoplasma gondii*** **infection and ABO blood group association among Pregnant Women at Rabak Teaching hospital, White Nile State, Sudan**

**Questionnaire**

| **Personal information** | | | |
| --- | --- | --- | --- |
| **Name** |  | | |
| **Patient’s ID No.** |  | | |
| **Age** |  | | |
| **Residence** |  | | |
| **Blood groups** | | | |
| ***Blood group type*** | | ***Answer (using “√ “)*** | |
| 1. **A** | |  | |
| 1. **B** | |  | |
| 1. **AB** | |  | |
| 1. **O** | |  | |
| **Pregnancy** | | | |
| 1. ***Gestational age*** | | ***Answer (using “√ “)*** | |
| 1. First trimester | |  | |
| 1. Second trimester | |  | |
| 1. Third trimester | |  | |
| 1. ***Abortion history*** | |  |  |
| 1. With history | |  |  |
| 1. Without history | |  |  |
| 1. ***Fever history*** | |  |  |
| 1. With history | |  |  |
| 1. Without history | |  |  |
| **Risk factors** | | |  |
| ***Risk factors*** | | ***History*** | ***Answer (using “√ “)*** |
| Cats | | with |  |
| without |  |
| Undercooked meat | | with |  |
| without |  |
| Working in a garden or a farm with bare hands | | With |  |
| without |  |
| Eating unwashed fresh fruits and vegetables | | with |  |
| without |  |
| Filth flies carrying oocyst from cat feces | | with |  |
| without |  |
